# Supplementary material
Source: PubMed Central journal article supplement (PMC4298645)
Supplement: irdr-3-153_001.pdf [file irdr-3-153_001.pdf]

Supplementary Data

Supplementary Table 1

|               | Australia | Chile    | Emirates | Guatemala | Indonesia | Italy    | Mexico   | Spain     | USA       | African American | Asians   | Basque    | Caucasians | Danish   | England  | Greenland | Hispanic | Hutterite | India    | Jewish Arabic | Malay Borneo Tibet | Northern Europe | Quebec   | South American |          |
|---------------|-----------|----------|----------|-----------|-----------|----------|----------|-----------|-----------|------------------|----------|-----------|------------|----------|----------|-----------|----------|-----------|----------|---------------|--------------------|-----------------|----------|----------------|----------|
| 23            | 1 (0%)    | 0 (0%)   | 0 (0%)   | 1 (1%)    | 2 (1%)    | 0 (0%)   | 0 (0%)   | 2 (1%)    | 2 (0%)    | 1 (1%)           | 3 (1%)   | 0 (0%)    | 0 (0%)     | 0 (0%)   | 1 (1%)   | 0 (0%)    | 0 (0%)   | 0 (0%)    | 0 (0%)   | 0 (0%)        | 0 (0%)             | 2 (1%)          | 0 (0%)   | 1 (1%)         |          |
| 24            | 0 (0%)    | 0 (0%)   | 2 (1%)   | 0 (0%)    | 0 (0%)    | 2 (3%)   | 0 (0%)   | 1 (0%)    | 2 (0%)    | 0 (0%)           | 1 (0%)   | 0 (0%)    | 0 (0%)     | 1 (0%)   | 0 (0%)   | 0 (0%)    | 0 (0%)   | 0 (0%)    | 0 (0%)   | 0 (0%)        | 3 (1%)             | 0 (0%)          | 0 (0%)   | 0 (0%)         |          |
| 25            | 1 (0%)    | 0 (0%)   | 2 (1%)   | 1 (1%)    | 0 (0%)    | 1 (1%)   | 0 (0%)   | 2 (1%)    | 1 (0%)    | 0 (0%)           | 0 (0%)   | 0 (0%)    | 0 (0%)     | 0 (0%)   | 0 (0%)   | 0 (0%)    | 0 (0%)   | 0 (0%)    | 0 (0%)   | 8 (3%)        | 0 (0%)             | 0 (0%)          | 0 (0%)   | 1 (1%)         |          |
| 26            | 1 (0%)    | 0 (0%)   | 0 (0%)   | 0 (0%)    | 1 (0%)    | 0 (0%)   | 0 (0%)   | 1 (0%)    | 2 (0%)    | 0 (0%)           | 0 (0%)   | 0 (0%)    | 0 (0%)     | 1 (0%)   | 0 (0%)   | 3 (2%)    | 0 (0%)   | 0 (0%)    | 0 (0%)   | 0 (0%)        | 2 (1%)             | 0 (0%)          | 1 (1%)   | 1 (1%)         |          |
| 29            | 0 (0%)    | 0 (0%)   | 0 (0%)   | 1 (1%)    | 3 (1%)    | 0 (0%)   | 0 (0%)   | 1 (0%)    | 2 (0%)    | 1 (1%)           | 0 (0%)   | 0 (0%)    | 1 (1%)     | 0 (0%)   | 0 (0%)   | 0 (0%)    | 0 (0%)   | 0 (0%)    | 0 (0%)   | 0 (0%)        | 2 (1%)             | 0 (0%)          | 0 (0%)   | 1 (1%)         |          |
| 30            | 0 (0%)    | 0 (0%)   | 1 (0%)   | 1 (1%)    | 6 (2%)    | 1 (1%)   | 0 (0%)   | 1 (0%)    | 4 (0%)    | 1 (1%)           | 1 (0%)   | 0 (0%)    | 1 (1%)     | 0 (0%)   | 0 (0%)   | 0 (0%)    | 0 (0%)   | 1 (2%)    | 0 (0%)   | 0 (0%)        | 0 (0%)             | 0 (0%)          | 0 (0%)   | 0 (0%)         |          |
| 10-A-10       | 0 (0%)    | 0 (0%)   | 1 (0%)   | 1 (1%)    | 0 (0%)    | 1 (1%)   | 0 (0%)   | 1 (0%)    | 0 (0%)    | 0 (0%)           | 0 (0%)   | 0 (0%)    | 6 (2%)     | 0 (0%)   | 0 (0%)   | 0 (0%)    | 0 (0%)   | 0 (0%)    | 0 (0%)   | 1 (0%)        | 0 (0%)             | 0 (0%)          | 1 (1%)   | 1 (1%)         |          |
| 10-A-10-A-9   | 0 (0%)    | 1 (1%)   | 16 (6%)  | 2 (1%)    | 1 (0%)    | 3 (4%)   | 0 (0%)   | 2 (1%)    | 31 (2%)   | 4 (3%)           | 15 (6%)  | 0 (0%)    | 0 (0%)     | 7 (3%)   | 0 (0%)   | 7 (4%)    | 0 (0%)   | 1 (1%)    | 2 (5%)   | 0 (0%)        | 0 (0%)             | 0 (0%)          | 0 (0%)   | 2 (2%)         |          |
| 10-A-19       | 1 (0%)    | 0 (0%)   | 3 (1%)   | 0 (0%)    | 3 (1%)    | 0 (0%)   | 2 (1%)   | 1 (0%)    | 14 (1%)   | 2 (1%)           | 3 (1%)   | 1 (0%)    | 0 (0%)     | 1 (0%)   | 0 (0%)   | 1 (1%)    | 0 (0%)   | 1 (1%)    | 0 (0%)   | 3 (3%)        | 2 (1%)             | 1 (0%)          | 0 (0%)   | 0 (0%)         |          |
| 10-A-20       | 3 (1%)    | 2 (3%)   | 1 (0%)   | 0 (0%)    | 3 (1%)    | 1 (1%)   | 2 (1%)   | 6 (2%)    | 3 (0%)    | 3 (2%)           | 3 (1%)   | 2 (1%)    | 1 (1%)     | 1 (0%)   | 0 (0%)   | 1 (1%)    | 0 (0%)   | 0 (0%)    | 2 (0%)   | 0 (0%)        | 2 (1%)             | 0 (0%)          | 0 (0%)   | 0 (0%)         |          |
| 10-A-21       | 1 (0%)    | 0 (0%)   | 0 (0%)   | 0 (0%)    | 0 (0%)    | 0 (0%)   | 1 (0%)   | 2 (1%)    | 3 (0%)    | 1 (1%)           | 1 (0%)   | 0 (0%)    | 0 (0%)     | 2 (1%)   | 0 (0%)   | 0 (0%)    | 0 (0%)   | 0 (0%)    | 2 (2%)   | 0 (0%)        | 2 (1%)             | 1 (1%)          | 0 (0%)   | 0 (0%)         |          |
| 10-A-22       | 1 (0%)    | 0 (0%)   | 0 (0%)   | 1 (1%)    | 1 (0%)    | 0 (0%)   | 3 (1%)   | 0 (0%)    | 1 (0%)    | 2 (1%)           | 3 (1%)   | 1 (0%)    | 0 (0%)     | 0 (0%)   | 0 (0%)   | 0 (0%)    | 0 (0%)   | 0 (0%)    | 0 (0%)   | 0 (0%)        | 0 (0%)             | 0 (0%)          | 0 (0%)   | 0 (0%)         |          |
| 10-A-9        | 22 (11%)  | 4 (5%)   | 7 (3%)   | 2 (1%)    | 2 (1%)    | 2 (3%)   | 11 (4%)  | 33 (9%)   | 22 (2%)   | 1 (1%)           | 5 (2%)   | 0 (0%)    | 13 (9%)    | 27 (11%) | 0 (0%)   | 26 (14%)  | 3 (4%)   | 1 (1%)    | 9 (22%)  | 2 (2%)        | 10 (4%)            | 1 (0%)          | 5 (6%)   | 1 (1%)         | 5 (4%)   |
| 10-A-9-A-10   | 10 (5%)   | 3 (4%)   | 7 (3%)   | 1 (1%)    | 0 (0%)    | 0 (0%)   | 14 (5%)  | 12 (3%)   | 52 (4%)   | 7 (5%)           | 24 (9%)  | 0 (0%)    | 3 (2%)     | 18 (7%)  | 0 (0%)   | 1 (1%)    | 1 (1%)   | 5 (6%)    | 1 (2%)   | 0 (0%)        | 2 (1%)             | 0 (0%)          | 11 (13%) | 3 (3%)         | 10 (9%)  |
| 10-A-9-A-11   | 1 (0%)    | 0 (0%)   | 0 (0%)   | 0 (0%)    | 0 (0%)    | 0 (0%)   | 0 (0%)   | 2 (1%)    | 1 (0%)    | 0 (0%)           | 5 (2%)   | 3 (1%)    | 0 (0%)     | 0 (0%)   | 0 (0%)   | 0 (0%)    | 0 (0%)   | 0 (0%)    | 0 (0%)   | 0 (0%)        | 1 (0%)             | 0 (0%)          | 0 (0%)   | 0 (0%)         |          |
| 10-A-9-A-8    | 0 (0%)    | 0 (0%)   | 0 (0%)   | 0 (0%)    | 0 (0%)    | 0 (0%)   | 0 (0%)   | 0 (0%)    | 0 (0%)    | 1 (1%)           | 0 (0%)   | 0 (0%)    | 0 (0%)     | 0 (0%)   | 0 (0%)   | 0 (0%)    | 0 (0%)   | 0 (0%)    | 0 (0%)   | 0 (0%)        | 0 (0%)             | 0 (0%)          | 19 (18%) | 0 (0%)         |          |
| 10-A-9-A-9    | 59 (29%)  | 40 (52%) | 72 (27%) | 62 (41%)  | 67 (21%)  | 26 (39%) | 96 (35%) | 129 (36%) | 592 (44%) | 24 (17%)         | 46 (18%) | 20 (9%)   | 75 (52%)   | 66 (26%) | 12 (39%) | 55 (30%)  | 45 (53%) | 41 (51%)  | 21 (52%) | 33 (38%)      | 85 (31%)           | 59 (29%)        | 25 (30%) | 24 (23%)       | 43 (38%) |
| 11-A-9        | 0 (0%)    | 0 (0%)   | 4 (2%)   | 0 (0%)    | 0 (0%)    | 1 (1%)   | 3 (1%)   | 0 (0%)    | 1 (0%)    | 1 (1%)           | 0 (0%)   | 0 (0%)    | 0 (0%)     | 0 (0%)   | 0 (0%)   | 0 (0%)    | 0 (0%)   | 0 (0%)    | 0 (0%)   | 0 (0%)        | 0 (0%)             | 0 (0%)          | 1 (1%)   | 0 (0%)         |          |
| 11-A-9-A-9    | 2 (1%)    | 0 (0%)   | 5 (2%)   | 2 (1%)    | 0 (0%)    | 0 (0%)   | 1 (0%)   | 0 (0%)    | 3 (0%)    | 0 (0%)           | 1 (0%)   | 0 (0%)    | 0 (0%)     | 0 (0%)   | 0 (0%)   | 0 (0%)    | 0 (0%)   | 1 (2%)    | 0 (0%)   | 1 (0%)        | 0 (0%)             | 0 (0%)          | 0 (0%)   | 0 (0%)         |          |
| 12-A-10       | 3 (1%)    | 1 (1%)   | 0 (0%)   | 0 (0%)    | 0 (0%)    | 0 (0%)   | 1 (0%)   | 2 (1%)    | 2 (0%)    | 0 (0%)           | 1 (0%)   | 0 (0%)    | 4 (3%)     | 3 (1%)   | 0 (0%)   | 3 (2%)    | 0 (0%)   | 0 (0%)    | 0 (0%)   | 2 (2%)        | 0 (0%)             | 0 (0%)          | 4 (5%)   | 0 (0%)         | 1 (1%)   |
| 12-A-9        | 0 (0%)    | 1 (1%)   | 0 (0%)   | 1 (1%)    | 1 (0%)    | 0 (0%)   | 1 (0%)   | 0 (0%)    | 1 (0%)    | 3 (2%)           | 2 (1%)   | 0 (0%)    | 1 (1%)     | 1 (0%)   | 0 (0%)   | 1 (1%)    | 0 (0%)   | 0 (0%)    | 0 (0%)   | 2 (1%)        | 3 (1%)             | 0 (0%)          | 0 (0%)   | 0 (0%)         |          |
| 13-A-9        | 3 (1%)    | 2 (3%)   | 5 (2%)   | 2 (1%)    | 2 (1%)    | 2 (3%)   | 2 (1%)   | 14 (4%)   | 14 (1%)   | 0 (0%)           | 0 (0%)   | 2 (1%)    | 8 (6%)     | 6 (2%)   | 0 (0%)   | 7 (4%)    | 0 (0%)   | 1 (1%)    | 1 (2%)   | 5 (6%)        | 17 (6%)            | 1 (0%)          | 0 (0%)   | 1 (1%)         | 2 (2%)   |
| 14-A-9        | 3 (1%)    | 1 (1%)   | 2 (1%)   | 0 (0%)    | 0 (0%)    | 0 (0%)   | 3 (1%)   | 1 (0%)    | 2 (0%)    | 1 (1%)           | 4 (2%)   | 0 (0%)    | 0 (0%)     | 0 (0%)   | 0 (0%)   | 0 (0%)    | 0 (0%)   | 0 (0%)    | 2 (2%)   | 2 (1%)        | 0 (0%)             | 0 (0%)          | 0 (0%)   | 0 (0%)         |          |
| 19-A-9        | 1 (0%)    | 0 (0%)   | 1 (0%)   | 4 (3%)    | 2 (1%)    | 0 (0%)   | 1 (0%)   | 0 (0%)    | 16 (1%)   | 0 (0%)           | 4 (2%)   | 1 (0%)    | 0 (0%)     | 0 (0%)   | 0 (0%)   | 0 (0%)    | 0 (0%)   | 1 (1%)    | 0 (0%)   | 2 (1%)        | 6 (3%)             | 1 (1%)          | 0 (0%)   | 1 (1%)         |          |
| 20-A-9        | 5 (2%)    | 0 (0%)   | 0 (0%)   | 0 (0%)    | 2 (1%)    | 0 (0%)   | 5 (2%)   | 1 (0%)    | 10 (1%)   | 0 (0%)           | 3 (1%)   | 1 (0%)    | 2 (1%)     | 0 (0%)   | 0 (0%)   | 0 (0%)    | 0 (0%)   | 0 (0%)    | 2 (2%)   | 3 (1%)        | 0 (0%)             | 1 (1%)          | 0 (0%)   | 2 (2%)         |          |
| 21-A-9        | 1 (0%)    | 0 (0%)   | 1 (0%)   | 0 (0%)    | 1 (0%)    | 0 (0%)   | 0 (0%)   | 0 (0%)    | 0 (0%)    | 1 (1%)           | 0 (0%)   | 2 (1%)    | 4 (3%)     | 0 (0%)   | 0 (0%)   | 0 (0%)    | 0 (0%)   | 0 (0%)    | 0 (0%)   | 2 (1%)        | 0 (0%)             | 0 (0%)          | 0 (0%)   | 0 (0%)         |          |
| 9-A-10        | 1 (0%)    | 0 (0%)   | 0 (0%)   | 0 (0%)    | 0 (0%)    | 0 (0%)   | 0 (0%)   | 0 (0%)    | 3 (0%)    | 0 (0%)           | 0 (0%)   | 0 (0%)    | 3 (2%)     | 0 (0%)   | 0 (0%)   | 0 (0%)    | 0 (0%)   | 1 (1%)    | 0 (0%)   | 2 (2%)        | 0 (0%)             | 1 (1%)          | 0 (0%)   | 0 (0%)         |          |
| 9-A-10-A-9    | 5 (2%)    | 0 (0%)   | 18 (7%)  | 5 (3%)    | 0 (0%)    | 1 (1%)   | 0 (0%)   | 6 (2%)    | 25 (2%)   | 1 (1%)           | 8 (3%)   | 0 (0%)    | 0 (0%)     | 4 (2%)   | 1 (3%)   | 5 (3%)    | 0 (0%)   | 1 (1%)    | 0 (0%)   | 2 (2%)        | 11 (4%)            | 1 (0%)          | 0 (0%)   | 3 (3%)         | 1 (1%)   |
| 9-A-11-A-9    | 0 (0%)    | 0 (0%)   | 1 (0%)   | 2 (1%)    | 1 (0%)    | 1 (1%)   | 0 (0%)   | 1 (0%)    | 1 (0%)    | 2 (1%)           | 1 (0%)   | 0 (0%)    | 0 (0%)     | 4 (2%)   | 0 (0%)   | 6 (3%)    | 0 (0%)   | 0 (0%)    | 0 (0%)   | 4 (1%)        | 0 (0%)             | 0 (0%)          | 1 (1%)   | 0 (0%)         |          |
| 9-A-12        | 0 (0%)    | 0 (0%)   | 0 (0%)   | 0 (0%)    | 1 (0%)    | 0 (0%)   | 1 (0%)   | 2 (1%)    | 4 (0%)    | 7 (5%)           | 4 (2%)   | 0 (0%)    | 1 (1%)     | 1 (0%)   | 0 (0%)   | 0 (0%)    | 0 (0%)   | 0 (0%)    | 0 (0%)   | 0 (0%)        | 0 (0%)             | 0 (0%)          | 1 (1%)   | 0 (0%)         |          |
| 9-A-12-A-9    | 2 (1%)    | 0 (0%)   | 1 (0%)   | 0 (0%)    | 3 (1%)    | 0 (0%)   | 1 (0%)   | 13 (4%)   | 9 (1%)    | 0 (0%)           | 3 (1%)   | 0 (0%)    | 5 (3%)     | 6 (2%)   | 0 (0%)   | 5 (3%)    | 2 (2%)   | 3 (4%)    | 0 (0%)   | 0 (0%)        | 2 (1%)             | 0 (0%)          | 4 (5%)   | 0 (0%)         | 1 (1%)   |
| 9-A-13        | 1 (0%)    | 0 (0%)   | 0 (0%)   | 0 (0%)    | 8 (3%)    | 0 (0%)   | 2 (1%)   | 1 (0%)    | 1 (0%)    | 0 (0%)           | 0 (0%)   | 4 (2%)    | 0 (0%)     | 0 (0%)   | 0 (0%)   | 0 (0%)    | 0 (0%)   | 0 (0%)    | 0 (0%)   | 0 (0%)        | 0 (0%)             | 0 (0%)          | 0 (0%)   | 1 (1%)         |          |
| 9-A-19        | 3 (1%)    | 2 (3%)   | 2 (1%)   | 0 (0%)    | 6 (2%)    | 0 (0%)   | 4 (1%)   | 2 (1%)    | 12 (1%)   | 4 (3%)           | 1 (0%)   | 5 (2%)    | 0 (0%)     | 0 (0%)   | 4 (13%)  | 0 (0%)    | 0 (0%)   | 1 (1%)    | 0 (0%)   | 0 (0%)        | 4 (1%)             | 1 (0%)          | 1 (1%)   | 0 (0%)         | 0 (0%)   |
| 9-A-20        | 1 (0%)    | 0 (0%)   | 2 (1%)   | 1 (1%)    | 1 (0%)    | 0 (0%)   | 0 (0%)   | 2 (1%)    | 5 (0%)    | 4 (3%)           | 2 (1%)   | 1 (0%)    | 1 (1%)     | 4 (2%)   | 0 (0%)   | 2 (1%)    | 0 (0%)   | 0 (0%)    | 0 (0%)   | 0 (0%)        | 2 (1%)             | 1 (0%)          | 0 (0%)   | 0 (0%)         | 0 (0%)   |
| 9-A-21        | 2 (1%)    | 0 (0%)   | 1 (0%)   | 1 (1%)    | 3 (1%)    | 0 (0%)   | 0 (0%)   | 0 (0%)    | 0 (0%)    | 1 (1%)           | 1 (0%)   | 0 (0%)    | 0 (0%)     | 0 (0%)   | 2 (1%)   | 0 (0%)    | 0 (0%)   | 0 (0%)    | 2 (2%)   | 1 (0%)        | 0 (0%)             | 0 (0%)          | 0 (0%)   | 1 (1%)         | 1 (1%)   |
| 9-A-22        | 0 (0%)    | 0 (0%)   | 1 (0%)   | 0 (0%)    | 9 (3%)    | 0 (0%)   | 0 (0%)   | 1 (0%)    | 3 (0%)    | 0 (0%)           | 2 (1%)   | 0 (0%)    | 1 (1%)     | 3 (1%)   | 0 (0%)   | 3 (2%)    | 1 (1%)   | 0 (0%)    | 0 (0%)   | 0 (0%)        | 0 (0%)             | 0 (0%)          | 0 (0%)   | 0 (0%)         | 0 (0%)   |
| 9-A-25        | 1 (0%)    | 0 (0%)   | 0 (0%)   | 0 (0%)    | 0 (0%)    | 0 (0%)   | 0 (0%)   | 1 (0%)    | 1 (0%)    | 1 (1%)           | 1 (0%)   | 0 (0%)    | 1 (1%)     | 3 (1%)   | 0 (0%)   | 0 (0%)    | 0 (0%)   | 0 (0%)    | 0 (0%)   | 1 (0%)        | 0 (0%)             | 0 (0%)          | 1 (1%)   | 0 (0%)         | 0 (0%)   |
| 9-A-26        | 0 (0%)    | 0 (0%)   | 0 (0%)   | 0 (0%)    | 1 (0%)    | 0 (0%)   | 0 (0%)   | 2 (1%)    | 1 (0%)    | 1 (1%)           | 0 (0%)   | 1 (0%)    | 0 (0%)     | 1 (0%)   | 0 (0%)   | 2 (1%)    | 0 (0%)   | 0 (0%)    | 2 (2%)   | 2 (1%)        | 1 (0%)             | 0 (0%)          | 0 (0%)   | 0 (0%)         | 0 (0%)   |
| 9-A-9         | 0 (0%)    | 0 (0%)   | 0 (0%)   | 1 (1%)    | 2 (1%)    | 0 (0%)   | 1 (0%)   | 1 (0%)    | 13 (1%)   | 1 (1%)           | 0 (0%)   | 2 (1%)    | 0 (0%)     | 0 (0%)   | 0 (0%)   | 0 (0%)    | 0 (0%)   | 2 (2%)    | 0 (0%)   | 0 (0%)        | 0 (0%)             | 0 (0%)          | 1 (1%)   | 0 (0%)         | 0 (0%)   |
| 9-A-9-A-10    | 1 (0%)    | 0 (0%)   | 5 (2%)   | 1 (1%)    | 5 (2%)    | 2 (3%)   | 3 (1%)   | 3 (1%)    | 23 (2%)   | 12 (9%)          | 10 (4%)  | 0 (0%)    | 0 (0%)     | 8 (3%)   | 0 (0%)   | 2 (1%)    | 0 (0%)   | 1 (1%)    | 0 (0%)   | 0 (0%)        | 0 (0%)             | 0 (0%)          | 0 (0%)   | 1 (1%)         | 1 (1%)   |
| 9-A-9-A-12    | 0 (0%)    | 0 (0%)   | 0 (0%)   | 0 (0%)    | 5 (2%)    | 0 (0%)   | 0 (0%)   | 5 (1%)    | 0 (0%)    | 0 (0%)           | 1 (0%)   | 3 (1%)    | 0 (0%)     | 1 (0%)   | 0 (0%)   | 0 (0%)    | 0 (0%)   | 0 (0%)    | 0 (0%)   | 0 (0%)        | 5 (2%)             | 0 (0%)          | 2 (2%)   | 1 (1%)         | 1 (1%)   |
| 9-A-9-A-13    | 0 (0%)    | 0 (0%)   | 1 (0%)   | 2 (1%)    | 1 (0%)    | 0 (0%)   | 0 (0%)   | 2 (1%)    | 3 (0%)    | 0 (0%)           | 2 (1%)   | 0 (0%)    | 1 (1%)     | 1 (0%)   | 0 (0%)   | 1 (1%)    | 0 (0%)   | 0 (0%)    | 0 (0%)   | 0 (0%)        | 0 (0%)             | 2 (2%)          | 1 (1%)   | 0 (0%)         | 0 (0%)   |
| 9-A-9-A-17    | 0 (0%)    | 0 (0%)   | 1 (0%)   | 0 (0%)    | 0 (0%)    | 0 (0%)   | 2 (1%)   | 1 (0%)    | 0 (0%)    | 0 (0%)           | 0 (0%)   | 3 (2%)    | 1 (0%)     | 0 (0%)   | 0 (0%)   | 4 (5%)    | 0 (0%)   | 0 (0%)    | 2 (2%)   | 0 (0%)        | 0 (0%)             | 0 (0%)          | 1 (1%)   | 0 (0%)         | 0 (0%)   |
| 9-A-9-A-19    | 4 (2%)    | 0 (0%)   | 1 (0%)   | 1 (1%)    | 1 (0%)    | 0 (0%)   | 1 (0%)   | 3 (1%)    | 0 (0%)    | 0 (0%)           | 1 (0%)   | 0 (0%)    | 0 (0%)     | 3 (1%)   | 0 (0%)   | 0 (0%)    | 0 (0%)   | 0 (0%)    | 0 (0%)   | 1 (0%)        | 0 (0%)             | 1 (1%)          | 0 (0%)   | 0 (0%)         | 0 (0%)   |
| 9-A-9-A-20    | 5 (2%)    | 0 (0%)   | 1 (0%)   | 0 (0%)    | 1 (0%)    | 0 (0%)   | 0 (0%)   | 1 (0%)    | 0 (0%)    | 0 (0%)           | 0 (0%)   | 0 (0%)    | 2 (1%)     | 0 (0%)   | 1 (1%)   | 0 (0%)    | 0 (0%)   | 0 (0%)    | 0 (0%)   | 0 (0%)        | 0 (0%)             | 0 (0%)          | 2 (2%)   | 0 (0%)         | 0 (0%)   |
| 9-A-9-A-6-A-9 | 0 (0%)    | 0 (0%)   | 0 (0%)   | 0 (0%)    | 20 (6%)   | 0 (0%)   | 0 (0%)   | 2 (1%)    | 7 (1%)    | 0 (0%)           | 0 (0%)   | 15 (7%)   | 0 (0%)     | 0 (0%)   | 0 (0%)   | 16 (19%)  | 0 (0%)   | 0 (0%)    | 8 (9%)   | 1 (0%)        | 11 (5%)            | 1 (1%)          | 0 (0%)   | 0 (0%)         | 0 (0%)   |
| 9-A-9-A-9     | 18 (9%)   | 17 (22%) | 50 (19%) | 42 (28%)  | 109 (35%) | 11 (16%) | 90 (32%) | 50 (14%)  | 381 (28%) | 17 (12%)         | 49 (19%) | 131 (61%) | 1 (1%)     | 25 (10%) | 5 (16%)  | 22 (12%)  | 3 (4%)   | 21 (26%)  | 2 (5%)   | 3 (3%)        | 63 (23%)           | 96 (48%)        | 15 (18%) | 8 (8%)         | 25 (22%) |
| 9-A-9-A-9-A-9 | 16 (8%)   | 0 (0%)   | 2 (1%)   | 0 (0%)    | 2 (1%)    | 0 (0%)   | 2 (1%)   | 0 (0%)    | 8 (1%)    | 0 (0%)           | 6 (2%)   | 1 (0%)    | 1 (1%)     | 2 (1%)   | 1 (3%)   | 0 (0%)    | 1 (1%)   | 1 (1%)    | 0 (0%)   | 2 (2%)        | 6 (2%)             | 5 (2%)          | 0 (0%)   | 0 (0%)         | 2 (2%)   |
| Other         | 22 (11%)  | 3 (4%)   | 46 (17%) | 13 (9%)   | 36 (12%)  | 12 (18%) | 24 (9%)  | 45 (13%)  | 78 (6%)   | 33 (24%)         | 42 (16%) | 20 (9%)   | 13 (9%)    | 42 (17%) | 8 (26%)  | 23 (13%)  | 8 (9%)   | 1 (1%)    | 2 (5%)   | 10 (12%)      | 27 (10%)           | 5 (2%)          | 8 (10%)  | 32 (31%)       | 10 (9%)  |

### Supplementary Data

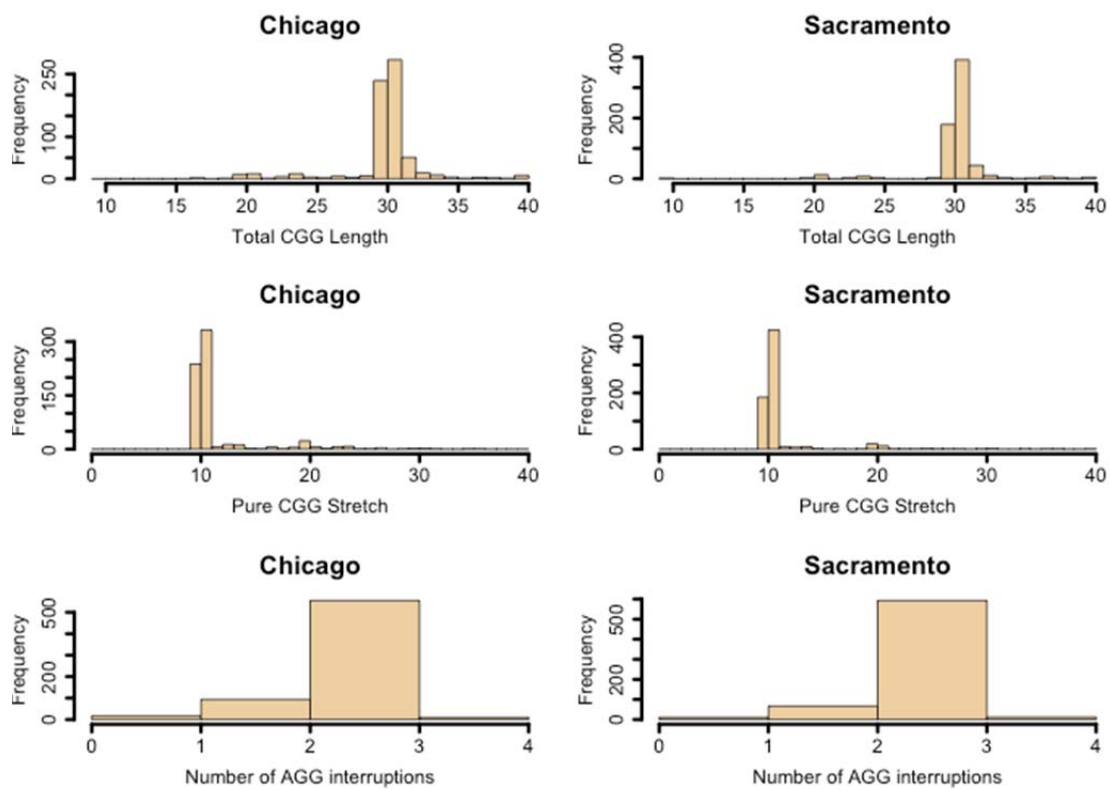

**Supplementary Figure 1. Comparisons of Chicago and Sacramento AGG interruption patterns.** The two collection sites for the USA cohort, Chicago and Sacramento show similarities in the distribution of alleles total length, pure stretch, and number of AGG interruptions.
